# Supplementary material for: Variability and drivers of winter near-surface temperatures over boreal and tundra landscapes
Source: Copernicus journal article supplement (doi:10.5194/egusphere-2023-576), 2023-04-19
Supplement: Supplementary file [file egusphere-2023-576-AC1-supplement.pdf]

We thank Jonathan von Oppen for his valuable and constructive feedback. His detailed and professional review was very useful and important for improving the manuscript. Here below, we provide a point-by-point response letter addressing the comments. Our responses are in blue and the line numbers (L) refer to the manuscript. The cited references are provided at the end of the letter. We thank you for your time and effort. Stay safe and take care.

On behalf of all the authors,  
Sincerely,  
Vilna Tyystjärvi

### *General comments*

The authors investigated winter temperatures near the ground surface and how they related to topography, vegetation, and snow cover, across several boreal forest and tundra landscapes. The study addresses an important topic, as winter microclimate has long been neglected despite its importance for Arctic plant biodiversity and potential crucial carbon feedbacks from soils. While overall not surprising, the findings add important evidence on terrain-snow-temperature relationships in boreal forest and tundra.

Overall, the manuscript is well written, the study was conducted thoroughly and used considerate methodology, and the authors generally communicate their findings in an appropriate way.

Thank you for the comment!

I do, however, see potential for improvement, as I find some methodological choices insufficiently justified and described. Despite repeatedly referring to spatial variation at the landscape level, this variation is not presented or analysed for how specific spatial patterns lay out across the landscapes studied, which could add another important insight.

We appreciate this comment and fully agree that a more explicit presentation of the spatial variation is needed in the manuscript. We will add a figure addressing that (see a comment below regarding the same issue). However, it seems that we have somewhat differing understandings of what spatial variation means. In our opinion, variation in space, be it either within a landscape (between sites) or between landscapes (between the different study areas) constitutes as spatial variation even if this variation is not shown in a geographically explicit way. Concerning spatial patterns within the landscapes, we think that such an analysis would require a considerably denser network of microclimate stations, especially when studying winter near-ground temperatures which may vary at very fine scales and thus consider this approach outside the scope of this study.

Centrally, I suggest the authors to revisit the choice and check for consistent use of specific terminology, such as for temperature variables or study locations, to avoid confusion on the readers' side.

We fully agree and will go through the manuscript with a fine comb to avoid further confusion.

Also, I think the impact of the study could be improved if including not only near-surface, but also below-ground temperatures, which are readily available from the dataset.

We understand the wish for adding below-ground temperatures in the analysis and agree that understanding their variation is important. However, we don't agree that they would necessarily improve the study. We expect that they are mostly correlated with above-ground near-surface temperatures but without sufficient data concerning soil properties, we cannot adequately

investigate the possible differences between these temperatures. Furthermore, the focus of this manuscript is on near-surface air temperatures and we think that adding one more level of variation would potentially confuse rather than improve the manuscript. Nonetheless, we look forward to discussing and analysing soil temperatures as well as their differences compared to air temperatures in-depth in upcoming manuscripts.

Some other shortcomings, such as the lack of in-situ snow depth data, cannot be easily overcome, but are being addressed in the manuscript. All that said, I think that the study is already presented well, and expect that these points will overall represent a minor revision effort. While some remarks concern very detailed points, that only indicates the already high level of the manuscript.

Thank you! We thoroughly appreciate the very detailed comments.

### *Specific comments*

The structure of the introduction is overall logical and nice to follow, but some things are a bit confusing and should be clarified (a large part of which is related to terminology).

The methods are overall solid and thorough, but some statements lack precision and empirical support.

I find it a bit hard to extract the most important findings in the results section. There are many detailed findings being presented, and it is sometimes a bit hard to follow. I do not have a very specific suggestion to improve this though. Perhaps one point to clarify would be the specific level of variation that you are looking at, as there are at least four in parallel (sites, areas, regions, winter seasons). You could use that to structure the text (e.g., (1) across areas and within winter season, (2) within area and within winter season, (3) within area, but between winter seasons, etc).

We agree that the section 3 is currently difficult to interpret. We will go through the text in close detail and make sure that the level of variation being discussed is always explicit and the text follows a clear structure within each paragraph, addressing separately the different levels of variation.

In addition, I think it is a pity that only relationships for above-ground temperatures are being presented. Given that recent research has shown e.g. the importance of vegetation cover for winter temperatures below-ground, and that this data is also available for this study, I think it could be interesting to repeat the analyses for below-ground temperatures and include the results either in the main text or in the appendix for comparison. I appreciate that this would mean some additional work on the authors' side, but I think it would increase the scope of the study even more as it would allow conclusions with regard to winter belowground processes in boreal forest and tundra ecosystems. In my opinion, it is a key strength of the study setup with TMS loggers and elevated loggers that it enables comparison of temperatures between different heights/layers along the soil, snow and vegetation profile in the same spot, and this could be exploited even further.

As discussed above, we don't feel that with our current dataset we could draw clear conclusions concerning winter below-ground processes and therefore, we don't think that bringing soil temperatures to the study would be beneficial. We do however acknowledge that this is an important question that requires further research in the future.

Finally, I would find it interesting to see how the actual spatial temperature patterns display on the different landscapes. This could be analysed through variograms, or simply by plotting the spatial layout

of the study sites with an associated temperature variable of interest. There are repeated references to “spatial variation” in the text, but the evidence that is currently being shown only represents across-site variation irrespective of spatially explicit relationships.

This is a good suggestion. We will add maps displaying more explicitly the spatial variation of winter near-surface temperatures in the different landscapes. We will try out the best options for implementing this but most likely we will draw maps of two to three different landscapes, showing variation in winter average near-surface temperatures as well as their temporal variation and we will add all landscapes in a supplementary figure. We will replace figure 4 with this new figure as suggested in a later comment. However, we would like to point out that the focus of our study is specifically spatial variation and not spatial patterns which in our understanding are different things, and, as explained above, inferring spatial patterns is out of our study design’s scope.

Although relatively brief, the discussion covers the immediate aspects related to the study’s findings well. However, I would suggest to expand a bit on the ecological implications, which are also mentioned in the first paragraph of the introduction (for instance with regard to vegetation dynamics or ecosystem processes such as permafrost dynamics or soil processes). In this context, the discussion currently only includes a brief reference to effects of snowmelt date on the start of the growing season.

Thank you for pointing this out. We agree that ecological implications of the study could be addressed in more detail. We will improve discussion on the matter in sections 4.1 and 4.4.

#### *Technical corrections*

Abstract:

L2 you use “near-surface temperature” before, so it’s not clear if this is the same?

It is, we will clarify the terminology here (and throughout the manuscript).

L2f it sounds more like you are looking at snow cover thickness, but only in L5 it becomes clear that it’s about snow cover duration. I suggest to make that clear from the start.

We will clarify this.

L10f “In the tundra” – it’s unclear if these differences were at the site/plot/... scale

The differences were within areas, we will change the sentence: “In the tundra, for example, differences in minimum near-surface temperatures between study sites were close to 30 °C.”

L11 “lead” should be “led” to match the past tense used otherwise.

L12 add a comma after “variation”, else you are saying that there was little decoupling with flat topography

Thank you for pointing these out.

*Introduction:*

L30ff In this paragraph, I find it a bit hard to distinguish when you are talking about forest and when about tundra. I suggest re-structuring the paragraph to make it easier to follow.

We will restructure the paragraph and clarify which processes are relevant in boreal and tundra areas.

L45 Why are you talking about ground temperatures here, while otherwise only about near-surface temperatures? If the reason is to introduce how you deduced snow cover duration, I recommend to be explicit about it.

We intended to mean near-surface temperatures and will fix the terminology accordingly.

L46 “absense” should probably be “absence”

That is true.

L46f “ground surface” is a confusing term if otherwise distinguishing between “ground temperatures” and “near-surface temperatures”.

We will harmonize the terminology used.

L49 “ice particles that affect vegetation growth” – in what way? Positively, negatively, why?

We agree that this is a confusing sentence and will change it followingly: “In cold climates a deep snowpack has shown to affect vegetation growth for example by increasing soil respiration rates and sheltering low-lying vegetation and roots from fluctuating air temperatures and erosive ice particles that cause stress for vegetation.”

Methods:

L74 Why are we looking at February specifically here?

We included the temperature of February here as it is later used in section 3.2 but we realize that mean temperature of winter months (Dec., Jan., Feb.) might be more suitable here and will change that.

L83 Please include the abbreviation for Hyytiälä as well.

Thank you for noticing that.

L88 How were the sites laid out in the landscape, i.e. how many plots over what size of an area? That information is essential if assessing spatial variation with regard to scale. Also, it sounds more like site locations were determined stratified randomly rather than strictly randomly, if they were aimed to cover these environmental gradients?

The locations were indeed selected stratified randomly, we will correct that. The sizes of the study areas varied from 15 to 50 km<sup>2</sup> which definitely is essential information here. We will include the following table in the manuscript to clarify this. Related to another comment, we will also add a figure representing the spatial variation of near-surface temperatures in the study areas which will also help to clarify how the study sites were located within the landscapes.

|                              | Study area                    | Number of sites: | Area (km <sup>2</sup> ) | Ecosystem                       |
|------------------------------|-------------------------------|------------------|-------------------------|---------------------------------|
| Northern Finland             | Malla nature reserve (MAL)    | 100 (40 with AT) | 24                      | Northern boreal forest & tundra |
|                              | Mount Ailakkavaara (AIL)      | 100 (40 with AT) | 24                      | Northern boreal forest & tundra |
|                              | Värriö nature reserve (VAR)   | 50               | 23                      | Northern boreal forest & tundra |
| Southern and Central Finland | Tiilikjärvi (TII)             | 50               | 18                      | Middle boreal forest            |
|                              | Pisa nature reserve (PIS)     | 50               | 16                      | Southern boreal forest          |
|                              | Hyytiälä nature reserve (HYY) | 50               | 52                      | Southern boreal forest          |
|                              | Karkali nature reserve (KAR)  | 50               | 48                      | Hemiboreal forest               |

L90f Is 15 cm height really “near-surface” in tundra environments, where often much of the vegetation is below that height? If you want, you could have a look at von Oppen et al. 2022 Global Change Biology for a suggestion for terminology.

We agree that in tundra environments, other terminology such as canopy-level temperatures (as suggested in the Oppen et al. 2022 paper) would be more suitable for the 15 cm measurement height. However, considering that we also have measurements at 150 cm height and in boreal forests where 15 cm doesn’t describe canopy-level temperatures, we would prefer to keep the terminology here as it is.

L97f How did you select the 40 plots for air temperature logging out of the 100 overall plots, and how did you ensure a balanced selection?

The 40 plots were selected with another stratified random sampling from the 100 original plots in a similar way to how the 100 plots were selected. Furthermore, the selected sites and their environmental information were visually inspected to ensure that they covered all relevant gradients in the study areas. We will clarify this in the text.

L99f Why did you choose such different logging intervals? Could that affect the data collected, e.g. underestimation of temporal variation in air T when measured through HOBO?

The loggers were set to different logging intervals due to varying memory and power constraints of the different logger types. We will clarify this in the text. We don’t expect this to affect the results considering that the used air temperatures have either been averaged over sufficiently long time periods (such as figures 3 and 5) or, in the case of figure 6, only times with both near-surface and air temperature measurements were used. We will clarify the data filtering in figure 6 in the text.

L105 Maybe “weather data” should be “weather station data”? Else I don’t find it intuitive that snow depth is included.

We agree and will change the term.

L105ff The paragraph doesn't make it clear to me why both point and gridded macroclimate data were used, or if there were differences in their use.

The gridded macroclimate data was only used in figure 1 to show variation in air temperatures and snow cover duration throughout Finland. Weather station data was used to describe winter weather conditions near the study areas in more detail in figures 2 and 1 and to get an estimate of average snow depths in the study areas during the study period. We will clarify these in section 2.3.

L112f So snow depths of less than 15 cm were considered snow-free? I assume there would still be some insulating effect even from a thin snow layer?

It is true that there is some insulating effect from a thin snow layer as well. However, the insulating capacity of a snowpack increases with increasing depth (see e.g. Zhang 2005) and previous studies have shown that particularly shallow autumn snowpacks poorly explain winter differences between surface and air temperatures (Grundstein 2005). Thus, we decided to focus on snow periods with over 15 cm of snow as we expected that to better describe the buffering effect of snow cover. Nonetheless, we recognize that this should be more explicitly explained in the manuscript.

L113ff "The loggers were estimated ... snow covered periods." Could you provide an empirical justification for this assumption – either from your data or citation? Why did you choose these specific moving window lengths or temperature thresholds? Also, this is a very complex and dense, yet central sentence to the paper, and I would recommend to restructure and simplify to make it easier to understand.

The thresholds and moving window lengths were selected based on manual tests to empirically find a range that best detected the snow cover period. The outcomes were visually checked for each logger and the chosen range was considered to produce the best result for our data without underestimating or overestimating the snow cover duration. We will restructure and simplify the sentence as well as underline further the empirical nature of the algorithm and the justification for the selected parameters.

L122f "... these situations were rare in our study domain, and the algorithm was considered to detect periods of snow cover reasonably well" – This is a very vague statement that in my opinion does not serve to increase trust in the method. Do you have e.g. in situ snow depth data that could provide empirical support?

Unfortunately, due to limited resources we don't have in situ snow depth data to provide further empirical support for our method. We base our estimation of the quality of the algorithm on thorough manual checks for each timeseries as well as figure A2 which shows that, on average, snow departure and arrival dates align well with nearby weather station snow data. We will clarify this in the text: "While determining the snow cover duration with this method is challenging in situations where snow depth varies close to the height of the sensor, we estimate these situations to be rare in our study domain based on thorough visual inspections of the data, and the algorithm was considered to detect periods of snow cover reasonably well."

L123 "are" should perhaps be "were"? I suggest to double-check use of tenses – I prefer past tense in the methods to refer to what was done to reach the conclusions, but that might be personal preference to some degree.

We agree with the suggested tense and will carefully go through the manuscript to make sure they are used correctly.

L134 “between a point and its surroundings” – perhaps rather between a grid cell and its surrounding cells?

We agree and will change the sentence as suggested.

L139 if only incorporating vegetation > 2m, were treeless tundra sites essentially assumed to have no canopy cover?

In the scope of this study, we considered only vegetation above 2 m. This was done because the canopy data that we used was based on LiDAR data that at its current resolution is unsuitable for detecting more low-lying vegetation. We chose this dataset as it covers all of our study areas and best allowed comparisons between the landscapes which we consider to be a key strength of our study. However, we recognize that tundra vegetation plays a very important role on snow dynamics, for example controlling snow accumulation patterns (e.g. Essery & Pomeory 2004), which are not accounted for in this study. We will add further discussion about this in section 4.2 and explain in section 2.5 that vegetation below 2 m was not considered.

L141 was it really spatial variation that was assessed in SEMs? From my perspective, variation among plots and sites, yes, but perhaps not explicitly spatial?

In our understanding variation in space, ie. among different sites (and regions), is explicitly spatial variation even if the locations of the sites are not explicitly given in the model.

L147 “two-week averages” – so you only used 2 weeks out of 8 months winter data for some sites?

To describe mid-winter and late winter temperatures, we did use two-week averages. These were calculated for all of the study sites and were used only in the SEMs. We decided to use two-week averages rather than for example monthly averages to avoid overlapping between the two variables as the snow cover season especially in 2019-2020 in the southern study areas was rather short. We will explain this more accurately in the methods.

L148f Does that mean that the end-of-snow season temperature is the two-week average before the end of snow cover season?

Yes. We will clarify that.

L149f “Snow cover ... late-season models” – As indicated above, I think “snow cover duration” would be more accurate here. Also, this sentence is quite complex and would benefit from simplifying.

We agree that in general in the manuscript, snow cover duration is a more accurate term. However, in this instance, we have particularly avoided using snow cover duration as the variable used in the late-season snow model is not snow cover duration but rather the melting date. We agree that the sentence is complex and will clarify it, explaining also better the differences in the late and mid-season models. We will also make this difference more clear in figure 5.

L152 I think the grouping approach is absolutely valid, but did you pool the data or average the effect sizes within groups of study areas?

We used the standardized regression coefficients so they could be directly compared with each other. We will clarify this in the text.

L157f “SEM is ... based on prior knowledge on how the system functions” – I think it could be useful to spell that prior knowledge out in a specific hypothesis / schematic figure etc, to clarify your expectations. Also, perhaps this descriptive bit could be combined with the background on the SEM method above (L142ff)?

We agree that spelling out the hypotheses would be very useful as they are indeed essential for using SEMs. We hypothesized air temperature to be mostly driven by coarse-scale topography (i.e. elevation and TPI500) while we expected snow cover duration and near-surface air temperatures to be influenced mostly by more fine-scale topography (i.e. TPI20, as well as potential incoming radiation during late winter) as well as canopy cover, although we also tested the relationship with canopy cover and air temperatures. Additionally, we tested how strongly snow cover duration and near-surface temperatures correlated with air temperatures and how strongly near-surface temperatures correlated with snow cover duration. We will add these hypotheses to the manuscript, although we think they are more appropriate in section 1.

L158f “We expected solar radiation to have only a marginal effect in mid-winter” – that is probably fair to assume, at least for the Northern study areas, but is that expectation backed up by any empirical data? Why not just include it and test this expectation?

SEMs depend on prior knowledge of the functioning of the ecosystem. We know that there is very little sun light in mid-winter in nearly all parts of Finland and therefore consider it safe to assume that it does not have a considerable effect on either snow cover duration or near-surface air temperatures. Adding extra variables that we can reasonably expect not to have a direct effect on the predicted variables also contains a risk of misinterpreting the results. Should the model show that solar radiation had an effect in mid-winter temperatures or snow cover duration, it could also be due to another process that is related to topography. Therefore, we do not consider it useful, nor justified, to include the solar radiation variable in the mid-winter models.

L160 “similar” is too vague here in my perspective. If not identical, I suggest describing the differences in model structure explicitly.

This is a good point. We will change the wording to “same”.

L160 see my remark above on spatial arrangement of the sites. I think some background info on site distribution in each area would be helpful.

We fully agree and will include a table and a new figure as mentioned above.

L161 “study area as a random intercept” – if I understand it correctly and “study area” = “landscape”, this random intercept will not account for spatial aggregation within a study area?

This is correct. We have accounted for the aggregation of the study sites within the different study areas, i.e. landscapes, but accounting for more explicit spatial aggregation is not, as far as we know, possible in a SEM. To avoid strong spatial aggregation within the study areas in the first place, we didn't place the study sites within 100 meters of each other when we designed the study setting.

*Results:*



L175f I don't think the "length of the snow cover season" is actually shown anywhere explicitly, or at least it is very hard to see with the non-transparent polygons in Fig. 2, but that would be interesting and useful information. Perhaps it could be added to Fig. 3?

We have included the length of the snow cover season in each study site in Figure 1 in the form of density curves. We will make sure it is referenced clearly in the text.

L176 "At the ground surface" vs. "near-surface" in the next sentence, but I assume they are referring to the same layer – again, I suggest you keep the terminology more consistent to avoid confusion.

This is correct and we will go through the terminology carefully.

L176 looking at Fig. 3 a/b, there are three levels of variation that this statement could be referring to - sites, areas, and years - and if seen across sites within areas, they actually varied more (as you are also mentioning further down), so this statement is not generally true. I suggest to be explicit about which level of variation you are referring to.

Thank you for pointing this out. In this sentence, we referred to the variation between study areas and we will change the sentence so that this is clear as well as clarify the levels of variation throughout the manuscript as explained in a previous comment.

L176 Why "mean February"? in the Methods, you only mention two-week averages. Is this referring to the same variable?

February is in most instances the coldest month in our study areas and the month when most of the study sites are under snow cover. Our intention here was to describe average winter thermal conditions across our study areas but as the macroclimatic conditions throughout Finland vary considerably, we decided to focus on one single month rather than calculating the average temperature of all usual winter months (Dec., Jan., Feb.). The variable calculated here is, as described, mean February temperature, and does not refer to the same variable as was used in the SEM. We will clarify this variable and its use in section 2.6.

L181 "There was also more variation in winter minimum near-surface temperatures" – where was that, and more than what/where?

We understand the confusion and will clarify the sentence: "There was also more variation within study areas in winter minimum near-surface temperatures compared to the mean February temperatures. Winter minimum temperatures varied on average by 10 degrees within the study areas and by 30 degrees in the northernmost study areas (Fig. 3 c)."

L221/223 See comments above on the use of "spatial variation" – I would use "across sites" here.

As we have explained above, we do think that spatial variation is the correct term here. However, we will additionally specify that we refer to variation within each study area here.

L225 Perhaps it would be worthwhile mentioning the negative exponential shape of the relationship here?

This is a good point and we will add a mention of it to the text.

*Discussion:*

L232 Either choose the term “heterogeneity” or “varied considerably” – both do not make sense here

We will correct this.

L235 “low-lying vegetation strongly influence snow accumulation patterns” – I agree from a theory point of view, but yet, SEMs did not identify a relationship between canopy cover and snow cover duration. This could be indicating the limited use of the canopy cover variable of choice for the tundra (see my remark in the methods section).

We fully agree. If we did have more accurate vegetation data, particularly describing more low-lying tundra vegetation, there might have been a more clear relationship between snow cover duration and vegetation in the tundra areas. This is a clear limitation of the vegetation variable that we selected and we will address this in more detail in the section 4.2.

L241f It might be better to stick to "canopy cover" here for consistence (as you do below) As I see it, “vegetation structure” is more complex than the way canopy cover was measured in this study (e.g. including cover at multiple heights, maximum height etc, so essentially three-dimensional).

We agree and will modify the terminology.

L256f I am not sure if I understand this sentence. As far as I am aware, De Frenne et al. (2019) actually found a positive buffering effect on minimum temperatures (i.e., a positive temperature offset). If this statement is meant to refer to offsets in mean temperatures, it should be rephrased to make that clearer. Also, importantly, I am in doubt if De Frenne et al. (2019) is a very appropriate reference in this context, as their analyses were mainly based on growing-season temperature records.

The sentence was trying to say that while forest cover has a positive buffering effect on minimum temperatures, the effect of forest canopy on average below-canopy temperatures in De Frenne’s study was cooling. We agree that the sentence is confusing and will clarify it, and we will reference more appropriate sources. For example, Renaud et al. (2011) found that forest cover had a cooling effect on winter daytime temperatures and warming effect on night-time temperatures compared to open areas. Latimer & Zuckerberg (2017) had similar findings but also found that different characteristics of forest structure had differing impacts on winter below-canopy temperatures, highlighting the complexity of forest microclimates. We will address this complexity better in section 4.2.

L257ff For canopy-snow interactions, you might also find the works of Malle et al (<https://doi.org/10.1029/2018JD029908>) and Mazzotti et al (<https://doi.org/10.1029/2019WR024898>, <https://doi.org/10.5194/hess-2022-273>) interesting, which represent some more recent developments in the field than the sources already cited.

Thank you for these sources, they provide valuable input to the discussion.

L261f The last sentence in this paragraph does not make sense as it is now, I suggest revisiting it.

The aim of the sentence was to say that including other vegetation-related variables in addition to canopy cover may have improved the modelling results but we agree that the sentence is currently poorly written. We will modify it while we add further discussion about the role of canopy cover in controlling snow cover duration, as suggested above.

L274 Maybe reiterate for the readers that these snow depths were measured at weather stations and not in situ. With regard to spatial variability, some of the above-mentioned references might be relevant here, too.

That is a good point, we will add a mention of the weather stations here.

*Figures:*

Fig. 1 for panel c) and d): it could be nice to have the comparison with the 1991-2020 period here as well, like in Figure 2. In the legend, it says “study areas”, whereas in the text, I think these have been referred to as “sites? Please indicate the data source in the figure caption.

Adding the normal period 1991-2020 period is a good suggestion which we will implement. We will also indicate the data source which for the panels a and b is the gridded macroclimate data mentioned in section 2.3. The photographs in panels e-g were taken by Vilna Tyystjärvi. We refer here to the study areas as the density curves show the variation within them (i.e. between the study sites in each study area). We will clarify this in the caption.

Fig. 2 Please indicate the data source in the figure caption. I find lines a bit misleading if showing monthly means for temperature, as they give the impression of continuous data. Maybe use dots instead or in addition? Adding outlines to the polygons (colour = ... argument in ggplot), or adjusting the colour scheme and/or transparency could make the snow depth data more readable. Also, I suggest to include the keyword macroclimate at the outset of the caption since that is used to refer to the figure in the text paragraph.

We will add dots to the figure as suggested and the mention of macroclimatic data. We will make the polygons more readable in one way or another. We did try adding outlines to the polygons which didn't particularly improve the readability.

Fig. 3 I suggest to make it clear that there was (apparently?) no snow in KAR in 2020-21. I recommend to add units to the temperature axes. Also, I find it difficult to compare variation in snow cover start vs end date with different axes on panels e) vs f), I think aligning them would make it easier to verify the statements made in the text (L193f).

There was snow in Karkal in 20-21 but not in 19-20. We will add a mention of this in the figure caption, and add units to the y-axis. Aligning the panels e and f is a good suggestion which we will implement.

Fig. 4 Aren't the shaded areas the snow cover-free periods, contrary to what it says in the caption? In addition, I noticed that this figure is actually being referred to very little in the text, and I think it adds relatively little to the information shown in Fig. 3, so you might consider moving it to the appendix.

We agree that currently Figure 4 does not bring much information to the manuscript. We will move it to the appendix and replace it with a new figure describing the spatial variation of near-surface temperatures within the landscape more explicitly as explained in a previous comment. We will also correct the caption.

Fig. 5 I recommend explaining the variable abbreviations in the caption. That would help to make the figure more stand-alone, so readers don't have to look them up in the text. Also, I suggest renaming the response variable “surface T.” to “near-surface T.” to increase coherence with the text.

We will clarify the caption and modify the figure as suggested.

Fig. 6 It is not clear from the plot if all vertical axes show beta or temperature differences. I suggest adding a label for clarification.

All vertical axes do indeed represent beta but this should be clearer from the figure. We will clarify the axes titles.

I hope that the authors will find my remarks helpful. I wish them good luck and all the best!

Jonathan von Oppen

Once again, thank you for your thorough comments! We also wish you all the best!

References:

- Essery, R. and Pomeroy, J. (2004), Vegetation and topographic control of wind-blown snow distributions in distributed and aggregated simulations for an Arctic tundra basin, *Journal of Hydrometeorology*, 5, 735–744, doi.org/10.1175/1525-541(2004)005<0735:VATCOW>2.0.CO;2.
- Grundstein, A., Todhunter, P., and Mote, T. (2005), Snowpack control over the thermal offset of air and soil temperatures in eastern North Dakota, *Geophys. Res. Lett.*, 32, L08503, doi.org/10.1029/2005GL022532.
- Latimer, C.E. and Zuckerberg, B. (2017), Forest fragmentation alters winter microclimates and microrefugia in human-modified landscapes. *Ecography*, 40: 158-170. doi.org/10.1111/ecog.02551.
- Renaud, V., Innes, J.L., Dobbertin, M. et al (2011), Comparison between open-site and below-canopy climatic conditions in Switzerland for different types of forests over 10 years (1998–2007). *Theor Appl Climatol* 105, 119–127, doi.org/10.1007/s00704-010-0361-0.
- Zhang, T. (2005), Influence of the seasonal snow cover on the ground thermal regime: An overview, *Reviews of Geophysics*, 43,455, doi.org/10.1029/2004RG000157.
